# Supplementary material for: Gene expression dynamics underlying cell fate emergence in 2D micropatterned human embryonic stem cell gastruloids
Source: PubMed Central journal article supplement — Stem Cell Reports. 2021 Apr 22;16(5):1210–27. doi: 10.1016/j.stemcr.2021.03.031 (PMC8185470; doi:10.1016/j.stemcr.2021.03.031), 2021-04-22
Supplement: mmc1.pdf [file mmc1.pdf]

**Stem Cell Reports, Volume 16**

**Supplemental Information**

**Gene expression dynamics underlying cell fate emergence in 2D micro-patterned human embryonic stem cell gastruloids**

**Kyaw Thu Minn, Sabine Dietmann, Sarah E. Waye, Samantha A. Morris, and Lilianna Solnica-Krezel**

## **Supplemental Experimental Procedures**

### ***BMP4 differentiation in 2D micropatterns***

H1 hESC were differentiated with BMP4 in the micropatterned substrates as previously described (Minn et al., 2020). Briefly, H1 hESC of karyotype 46, XY (WiCell, Madison, WI), routinely cultured in Matrigel-coated plates with mTeSR media (Stemcell Technologies, Vancouver, Canada), were differentiated with BMP4 in the micropatterned substrates as previously described (Minn et al., 2020). Briefly, H1 cells were dissociated with Accutase (Sigma Aldrich, St. Louis, MO) incubation at 37°C and 5% CO<sub>2</sub> for 8 min. Equal volume of RPMI medium 1640 (Life Technologies, Carlsbad, CA) was added, and the cell solution was centrifuged at 300 rcf (relative centrifugal force) for 5min. After the supernatant was removed, cells were diluted with fresh mTeSR, and seeded onto micropatterns at 132,000–263,000 cells/cm<sup>2</sup> in mTeSR with 10 μM Rho-associated kinase inhibitor (ROCKi Y-27632, Millipore Sigma, Burlington, MA). After 2h, the medium was replaced with fresh mTeSR, and cultured for additional 3h. Afterwards (6h after initial cell seeding), the medium was replaced with mTeSR containing 50 ng/mL BMP4 (R&D Systems, Minneapolis, MN) for 12h, 24h, and 44h.

### ***scRNA-seq and data analysis***

Single cells collection and scRNA-seq and data analyses were performed as described previously (Minn et al., 2020). Briefly, micropatterned cells after 12h, 24h, and 44h BMP4 treatment were washed with PBS, and dissociated into single cells with Accutase incubation at 37°C and 5% CO<sub>2</sub> for 10 min. Equal volume of RPMI medium was added, and the solution was centrifuged 300 rcf for 5 min. After the supernatant was removed, cells were diluted at 20,000 cells per 200 μL of cold DPBS-/- . Afterwards, 800 μL of cold

methanol was added dropwise to the cell solution, and incubated on ice for 15 min. The final solution was kept at -80°C until use.

10x Chromium Single Cell 3' Library & Gel Bead Kit v2, Chromium Next GEM Single Cell 3' GEM, Library & Gel Bead Kit v3.1, Chromium Next GEM Single Cell 3' Kit v3.1, Chromium Next GEM Chip G Single Cell Kit, Single Index Kit T Set A, and Dual Index Kit TT Set A and Chromium i7 Multiplex Kit (10X Genomics, Pleasanton, CA) were used according to the manufacturer's instructions to prepare single-cell library. Agilent TapeStation (Agilent Scientific Instruments, Santa Clara, CA) was used to quantify cDNA libraries. Sequencing was performed on Illumina HiSeq 2500 and NextSeq500 (Illumina, San Diego, CA).

The Cell Ranger v.2.1.0 pipeline was used to align reads to a custom hg19 genome build including transgenes, and to generate a digital gene expression matrix. Seurat package (v.3.2.0) was used for processing and visualization (Butler et al., 2018; Stuart et al., 2019). Default settings were used unless noted otherwise. For each dataset, cells with outlier number of genes and mitochondrial gene expression were excluded. We normalized and scaled the filtered expression matrix to remove unwanted sources of variation driven by mitochondrial gene expression, the number of detected UMIs, and the cell cycle. For 24h and 44h datasets, we combined replicates at each time point using canonical correlation analysis selecting for 30 dimensions and 3,000 anchor features (highly variable genes). Next, we combined all 12h, 24h, and 44h datasets using the same parameters. Nonlinear dimensionality reduction by UMAP was performed on the first 30 principal components using the implementation by Seurat. With previously annotated 44h cells serving as reference (Minn et al., 2020), we

annotated cells at 12h and 24h using FindTransferAnchors and TransferData functions in Seurat. This anchor-based approach calculated prediction score in each 12h and 24h cell for referenced 44h cell types. Each 12h or 24h cell with the highest prediction score for a particular 44h cell type was annotated as that cell type. DEGs across cell types or time course were identified using FindMarkers or FindAllMarkers functions, with threshold settings of 0.25 log fold-change and 25% detection rate.

For comparison with published dataset, CCA was used as described above for combining gastruloid datasets. Average gene expression correlation was calculated using Spearman correlation on the basis of highly variable genes from reference datasets. Prediction score was calculated using the anchor-based approach described above, after the reference and query datasets were combined with CCA. Module score was calculated using AddModuleScore function in Seurat, which calculates the difference in average gene expression between a set of marker genes of interest and that of randomly selected genes (Tirosh et al., 2016).

Diffusion maps for single cells were calculated based on the normalized and scaled gene expression data matrix using the R Bioconductor *destiny* package (Angerer et al., 2016), with a number of k-nearest neighbors,  $knn = 40$ , and a Gaussian kernel width,  $\sigma = 8$ , slightly lower than the optimal value of  $\sigma$  estimated by *destiny*. A probabilistic breadth-first search of the k-nearest neighbor graph was performed and the results of this search were converted into a pseudotime.

To identify genes differentially expressed between emergent cell populations (Ectoderm versus 0h hESCs, Table 1S), we used the Seurat FindMarkers function to compare against all other cells types and used Seurat threshold of  $\logFC > 0.1$  and p

value < 0.05 to consider as significant differences in expression. In addition, we inspected the localized expression in a scatterplot.

## References:

- Angerer P, Haghverdi L, Büttner M, Theis FJ, Marr C, Buettner F. 2016. destiny: diffusion maps for large-scale single-cell data in R. *Bioinform* **32**:1241–1243. doi:10.1093/bioinformatics/btv715
- Butler A, Hoffman P, Smibert P, Papalexi E, Satija R. 2018. Integrating single-cell transcriptomic data across different conditions, technologies, and species. *Nat Biotechnol* **36**:411–420. doi:10.1038/nbt.4096
- Stuart T, Butler A, Hoffman P, Hafemeister C, Papalexi E, Mauck WM, Hao Y, Stoeckius M, Smibert P, Satija R. 2019. Comprehensive Integration of Single-Cell Data. *Cell* **177**:1888-1902.e21. doi:10.1016/j.cell.2019.05.031
- Tirosh I, Izar B, Prakadan SM, Wadsworth MH, Treacy D, Trombetta JJ, Rotem A, Rodman C, Lian C, Murphy G, Fallahi-Sichani M, Dutton-Regester K, Lin JR, Cohen O, Shah P, Lu D, Genshaft AS, Hughes TK, Ziegler CGK, Kazer SW, Gaillard A, Kolb KE, Villani AC, Johannessen CM, Andreev AY, Van Allen EM, Bertagnolli M, Sorger PK, Sullivan RJ, Flaherty KT, Frederick DT, Jané-Valbuena J, Yoon CH, Rozenblatt-Rosen O, Shalek AK, Regev A, Garraway LA. 2016. Dissecting the multicellular ecosystem of metastatic melanoma by single-cell RNA-seq. *Science (80- )* **352**:189–196. doi:10.1126/science.aad0501

Figure 1S

A

| Experiment      | # colonies per experiment | # of cells after QC | Average genes per cell | Average UMI per cell |
|-----------------|---------------------------|---------------------|------------------------|----------------------|
| 0h Replicate 1  | 36                        | 1,422               | 3,121                  | 11,549               |
| 0h Replicate 2  | 36                        | 1,397               | 3,825                  | 17,352               |
| 12h Replicate 1 | 36                        | 766                 | 4,194                  | 23,756               |
| 12h Replicate 2 | 36                        | 378                 | 4,274                  | 19,899               |
| 24h Replicate 1 | 36                        | 947                 | 4,525                  | 30,756               |
| 24h Replicate 2 | 36                        | 1,588               | 4,011                  | 25,130               |
| 44h Replicate 1 | 36                        | 1,858               | 4,981                  | 29,609               |
| 44h Replicate 2 | 36                        | 811                 | 3,801                  | 14,612               |

B

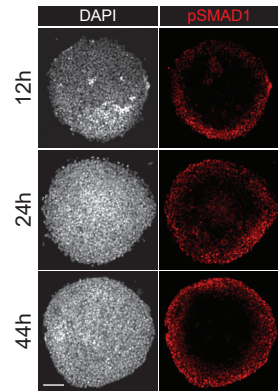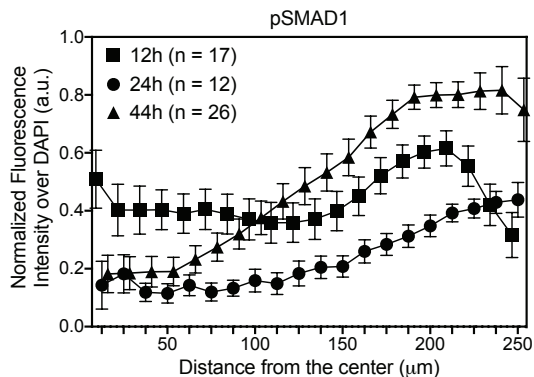

C

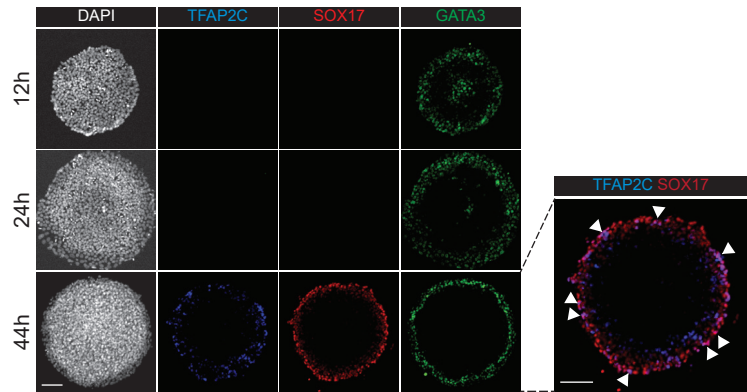

**Figure 1S. Supplemental information related to Figure 1**

(A) Selected parameters for scRNA-seq analysis.

(B) Immunofluorescence images (left) and quantification of fluorescence intensity (right) for BMP4 downstream effector pSMAD1. Data are represented as mean  $\pm$  SEM.

(C) Immunofluorescence analysis of SOX17, TFAP2C, and GATA3. Arrow heads indicate selected hPGCLCs co-expressing SOX17 and TFAP2C.

Scale bar is 100 $\mu$ m.

Figure 2S

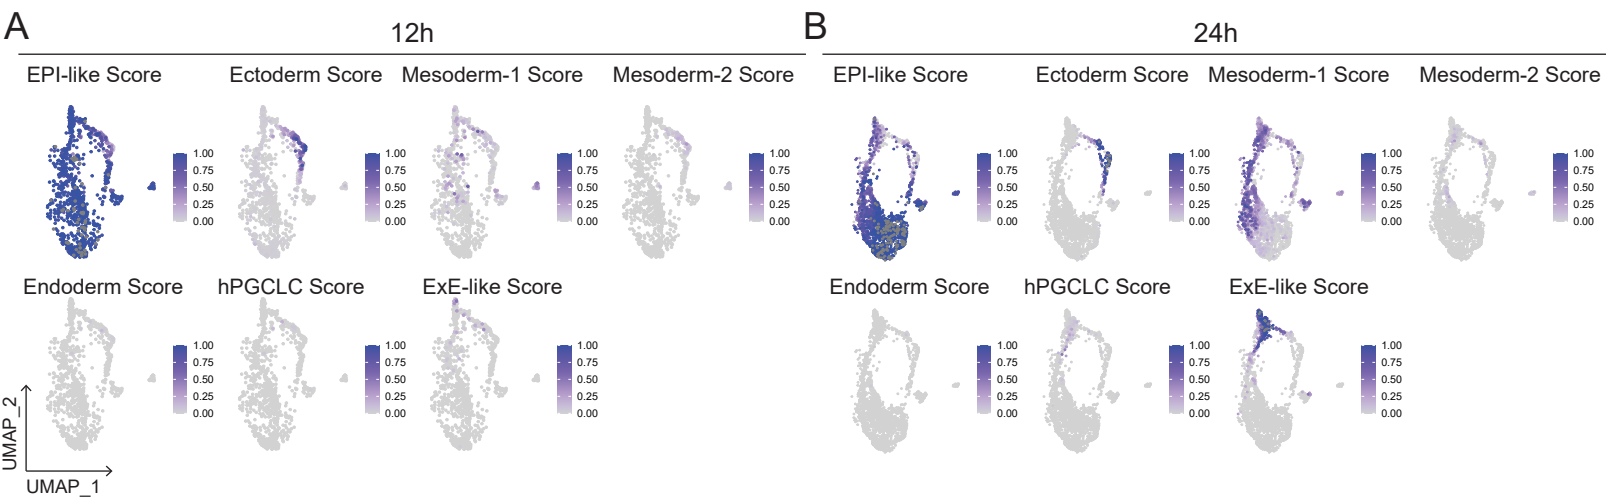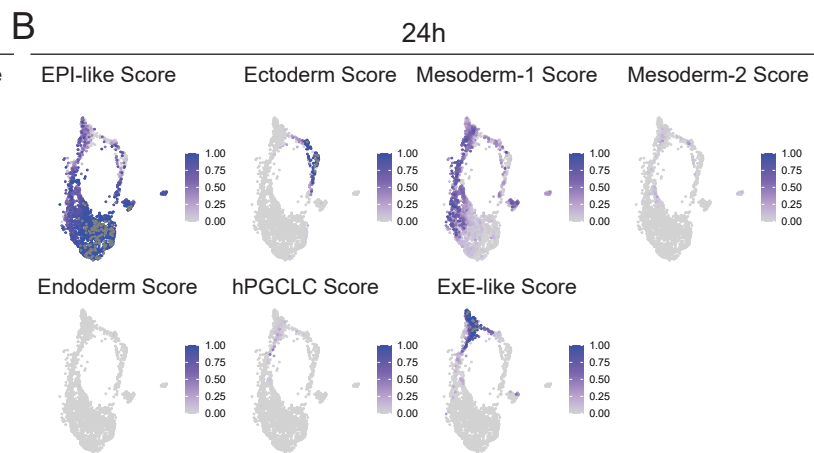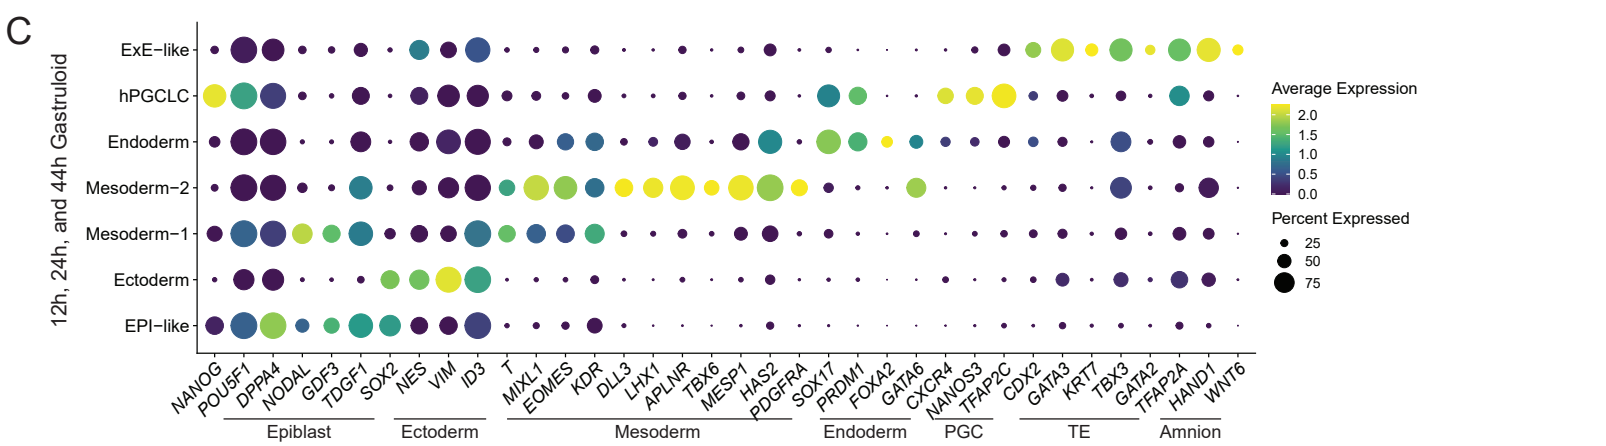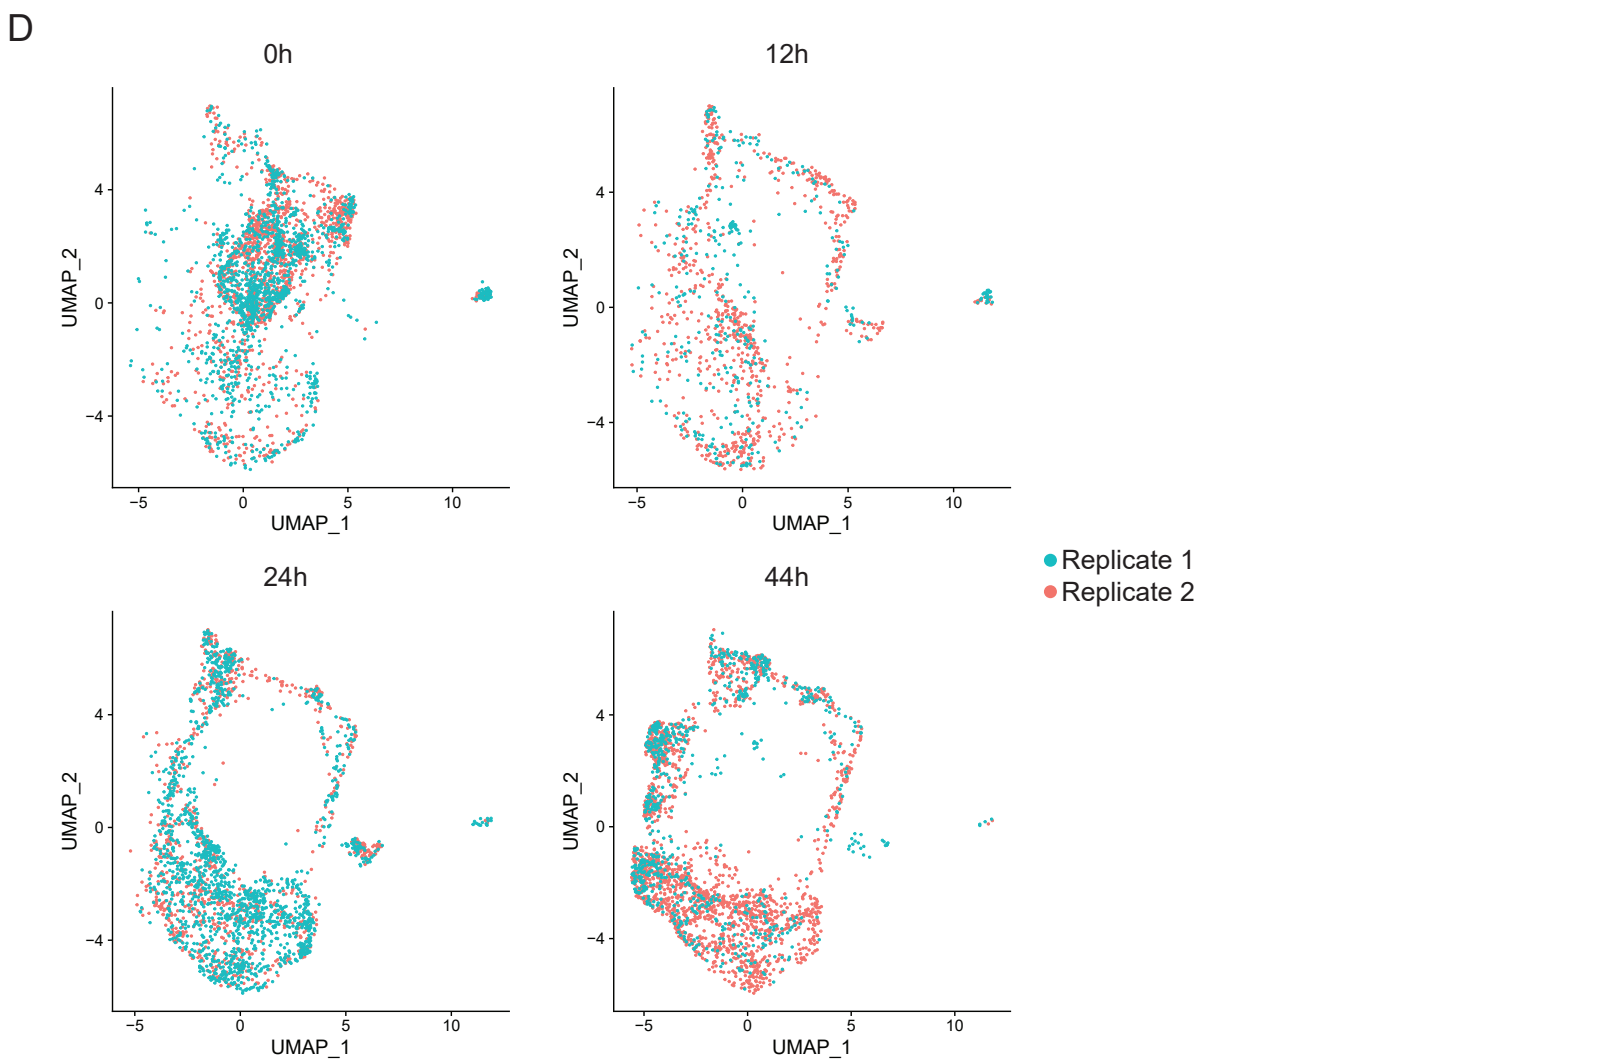



**Figure 2S. Supplemental information related to Figure 2**

(A and B) Cell type prediction scores for cells treated with BMP4 for 12h (A), and 24h

(B), using 44h gastruloid cells as reference.

(C) Dot plots displaying expression of canonical markers of indicated cell types in gastruloid clusters at indicated time points.

(D) UMAP display of overlap between replicates at each indicated time point.

Figure 3S

A

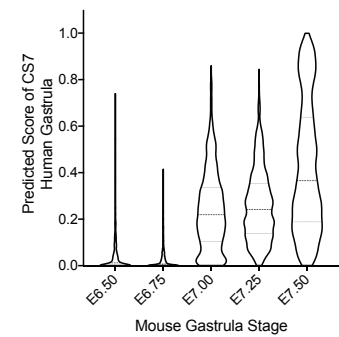

B

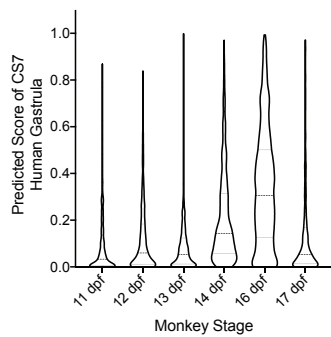

C

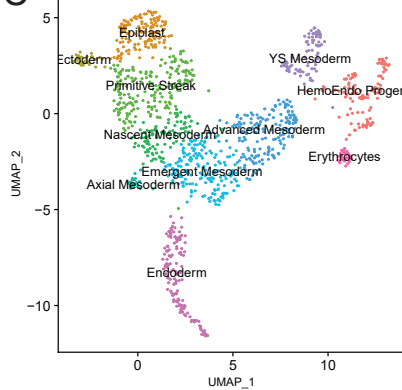

D

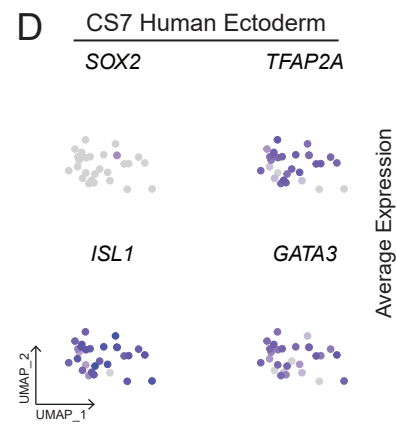

E

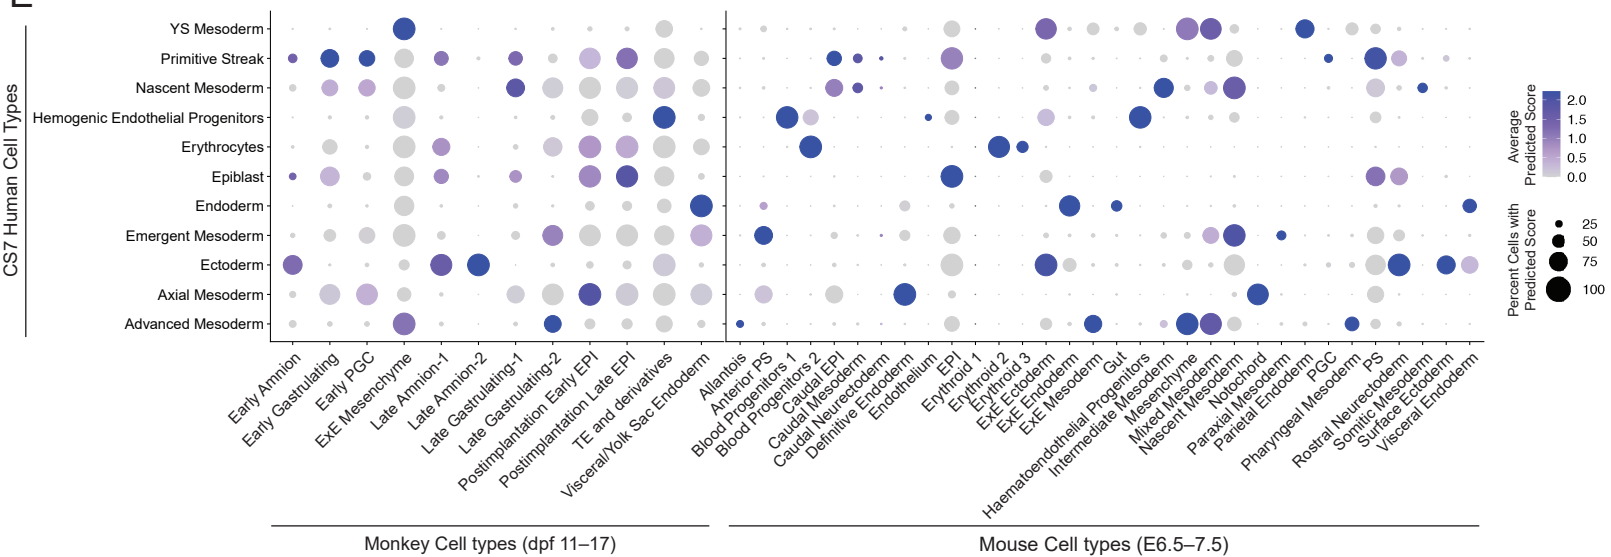

F

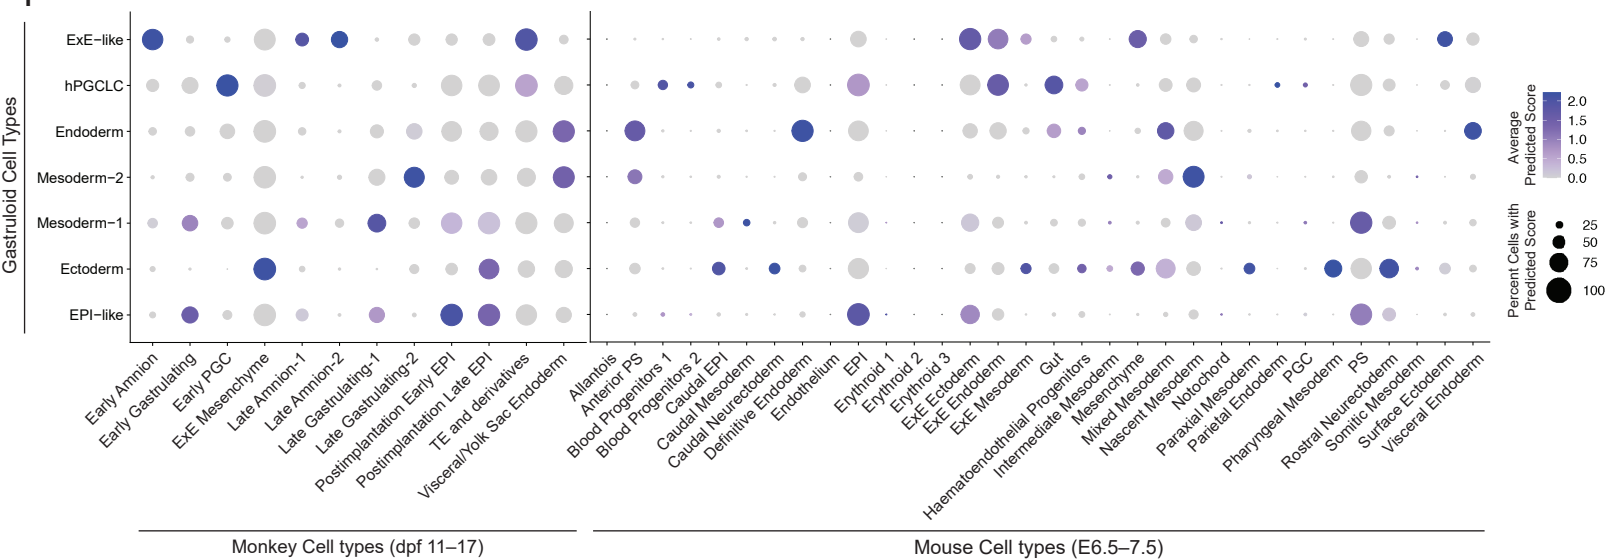

**Figure 3S. Supplemental information related to Figure 3**

(A and B) Prediction score of mouse (A) and monkey (B) gastrula stages in CS7 human gastrula.

(C) UMAP projection showing 11 major cell types reported in CS7 human (Tyser et al., 2020).

(D) UMAP display of indicated markers expression in CS7 Ectoderm.

(E and F) Prediction score of E6.5–7.5 mouse and 11–17 dpf monkey gastrulating cell types in CS7 human gastrula (E) and gastruloids (F).

Figure 4S

A

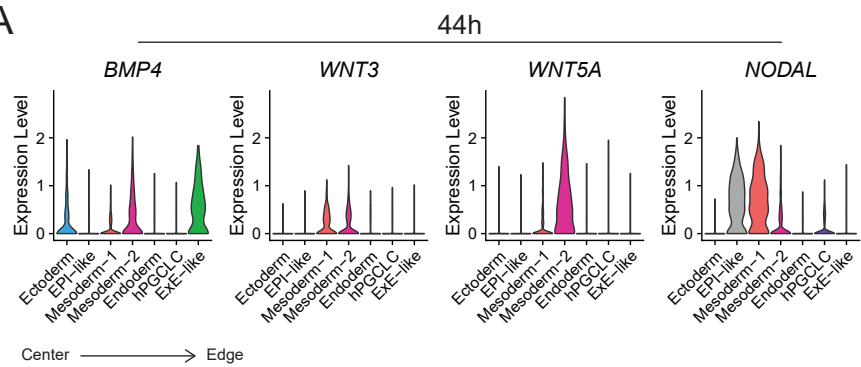

B

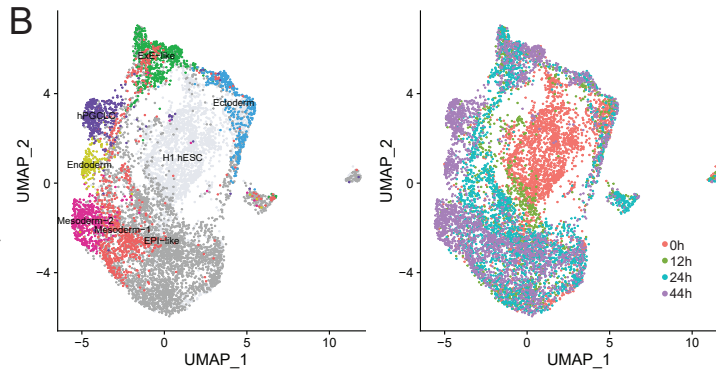

C

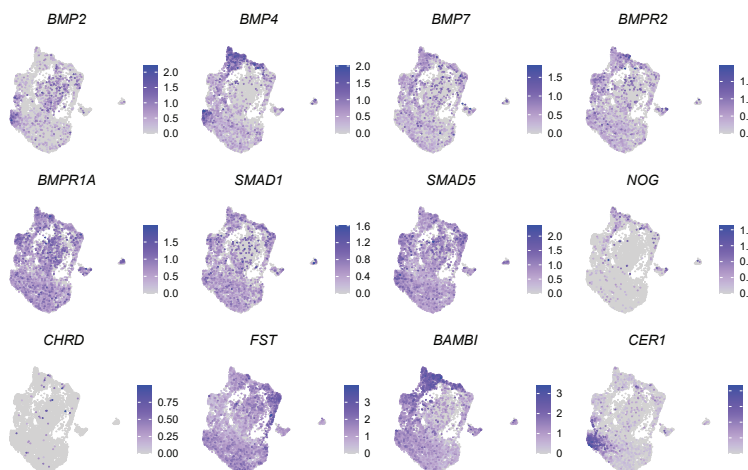

E

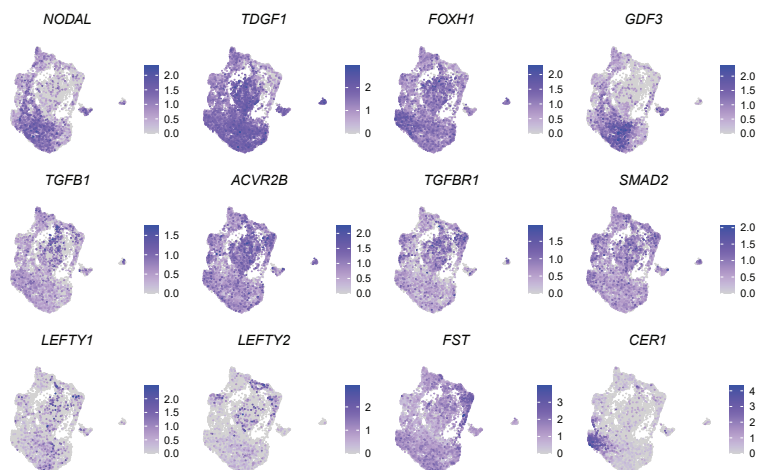

D

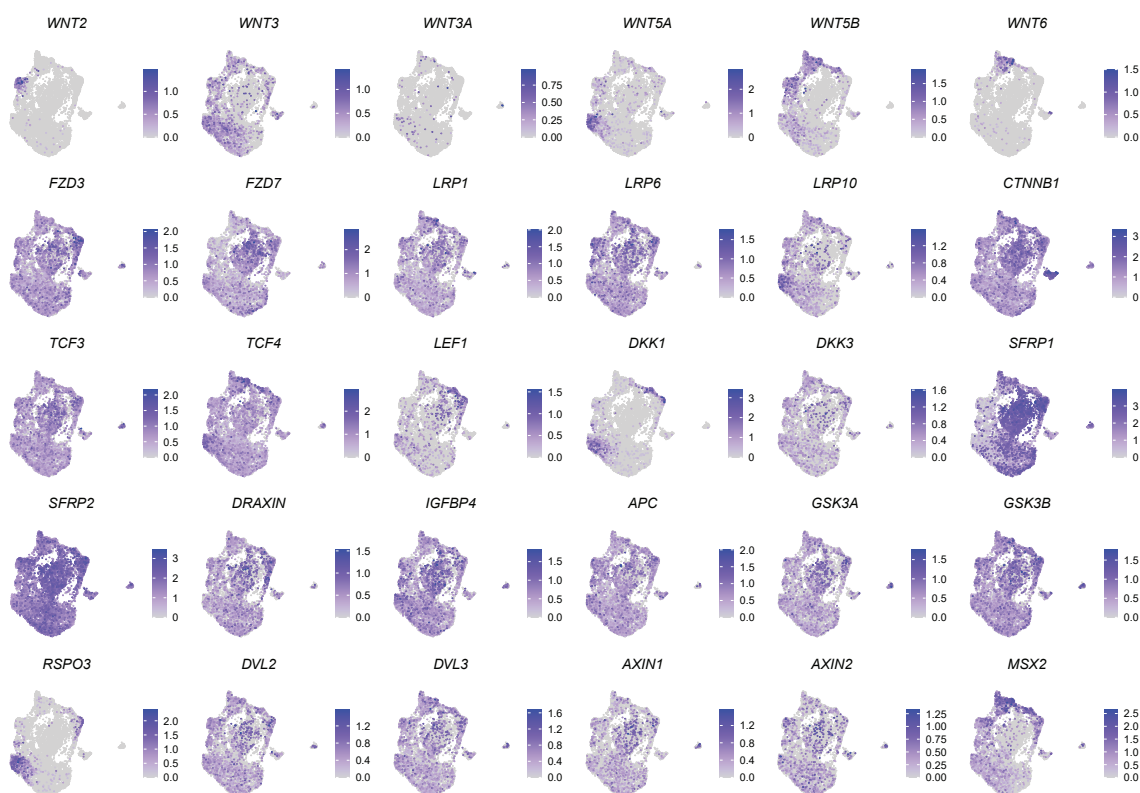

F

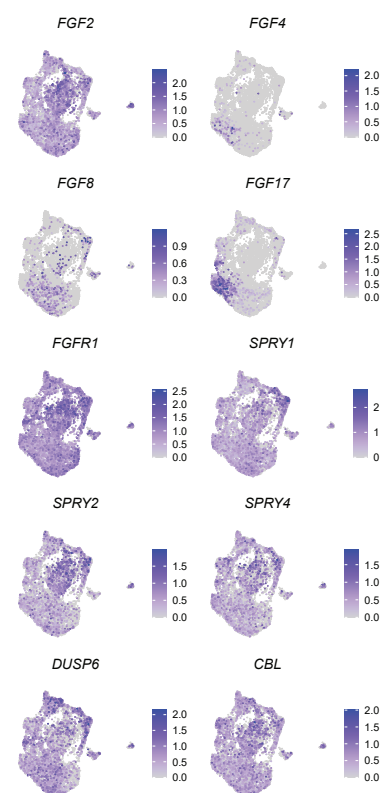

G

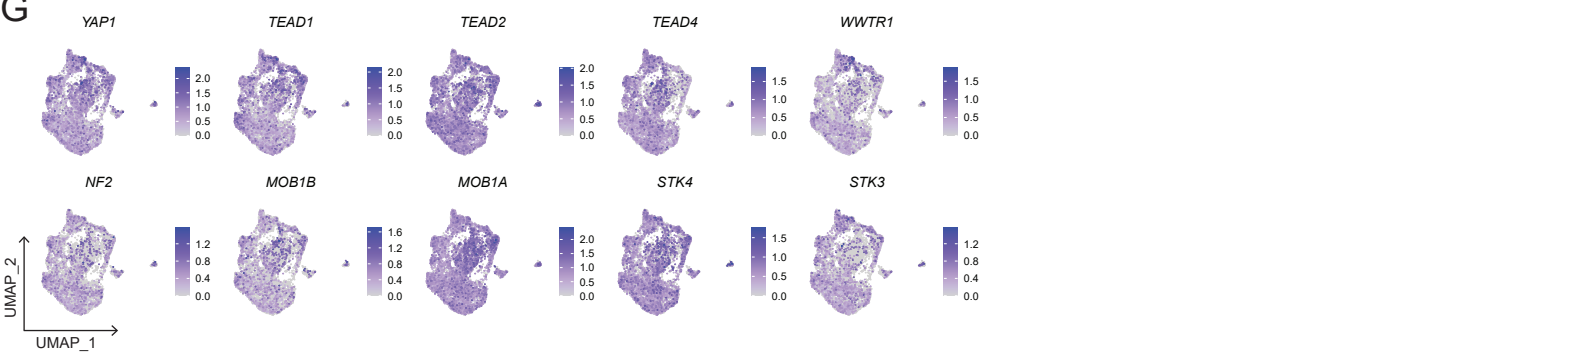

**Figure 4S. Supplement information related to Figure 4**

(A) Expression of genes encoding indicated signaling molecules in 44h gastruloid.

(B) UMAP display of annotated gastruloid cell types at indicated time points.

(C–G) Gene expression of indicated components of BMP (B), NODAL (C), WNT (D), FGF (E), and HIPPO (F) signaling pathway in all cell types across all time points.

Figure 5S

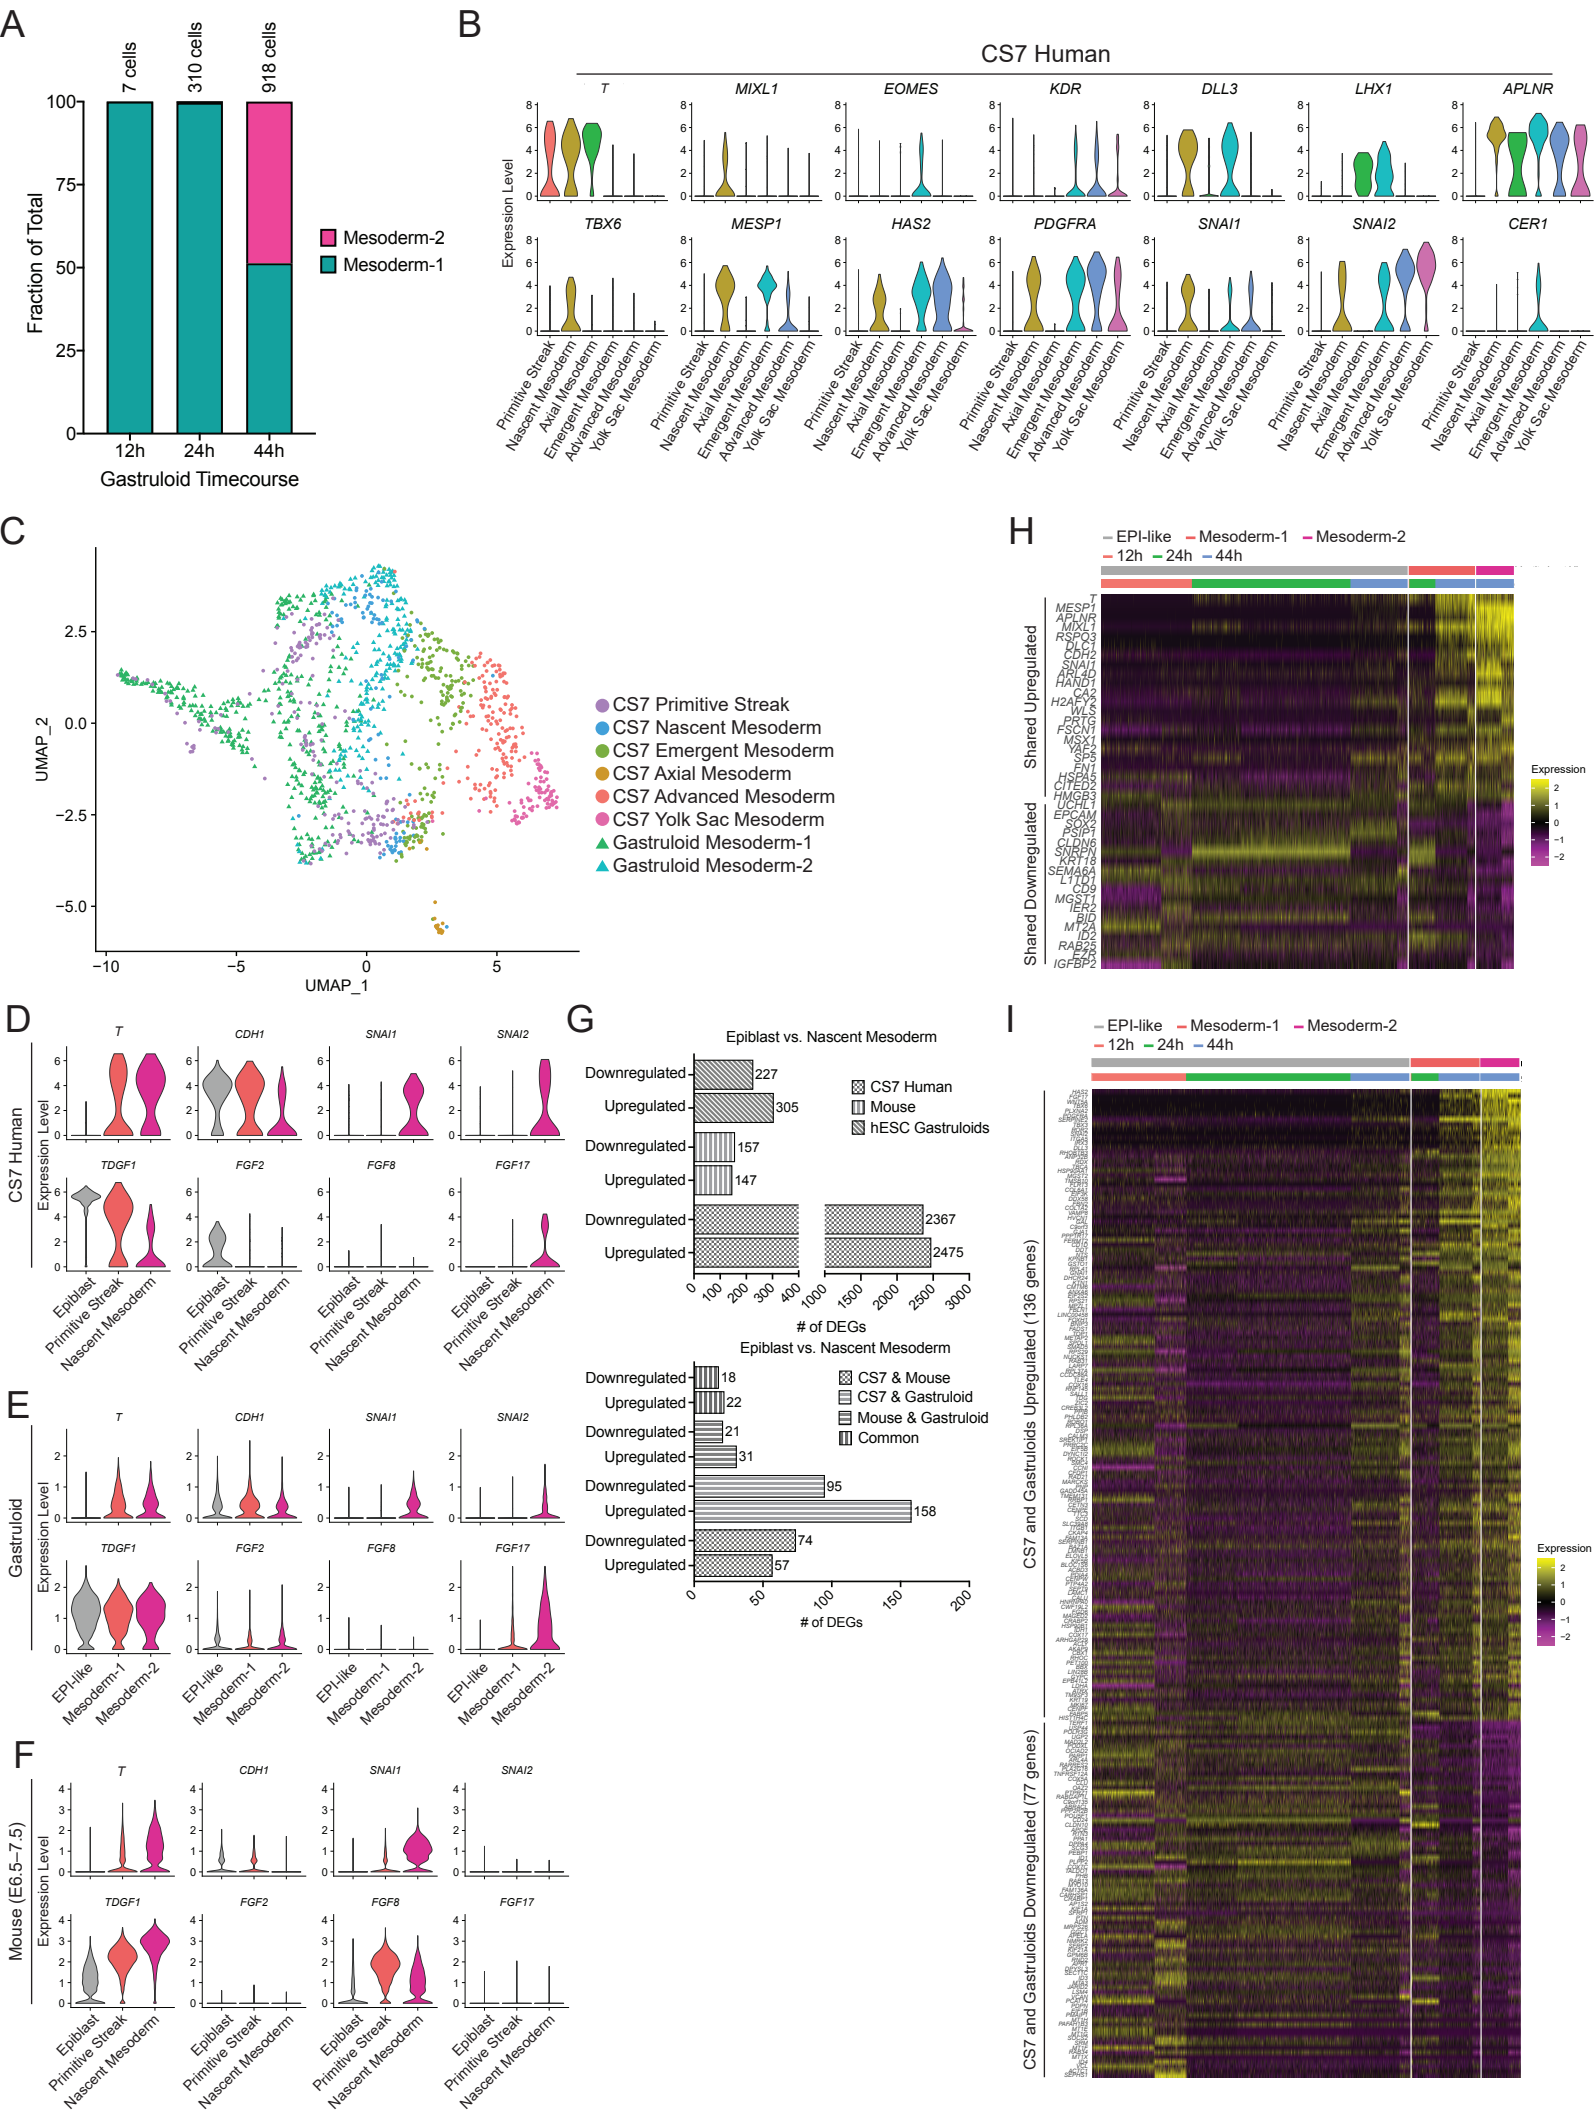

**Figure 5S. Supplement information related to Figure 5**

(A) Fraction of gastruloid Mesoderm-1 and -2 cells at indicated time points.

(B) Expression of indicated PS and mesoderm markers in CS7 PS and mesoderm derivatives.

(C) UMAP projection of CS7 human primitive streak and mesoderm derivatives, and gastruloid Mesoderm-1 and -2 cells.

(D–F) Violin plots showing expression of indicated mesoderm markers in transition from EPI to nascent mesoderm cells in CS7 human gastrula (D), gastruloids (E), and mouse gastrula (F).

(G) Bar plots indicating number of downregulated and upregulated genes (top) and shared downregulated and upregulated genes (bottom) in Nascent Mesoderm (gastruloid Mesoderm-2 equivalent) compared to EPI (gastruloid EPI-like equivalent) in human, mouse, and hESC gastruloids.

(H) Heatmap depicting downregulated and upregulated genes of Nascent Mesoderm shared in human, mouse, and hESC gastruloids.

(I) Heatmap depicting downregulated and upregulated genes of Nascent Mesoderm shared in human, and hESC gastruloids but not in mouse.

Figure 6S

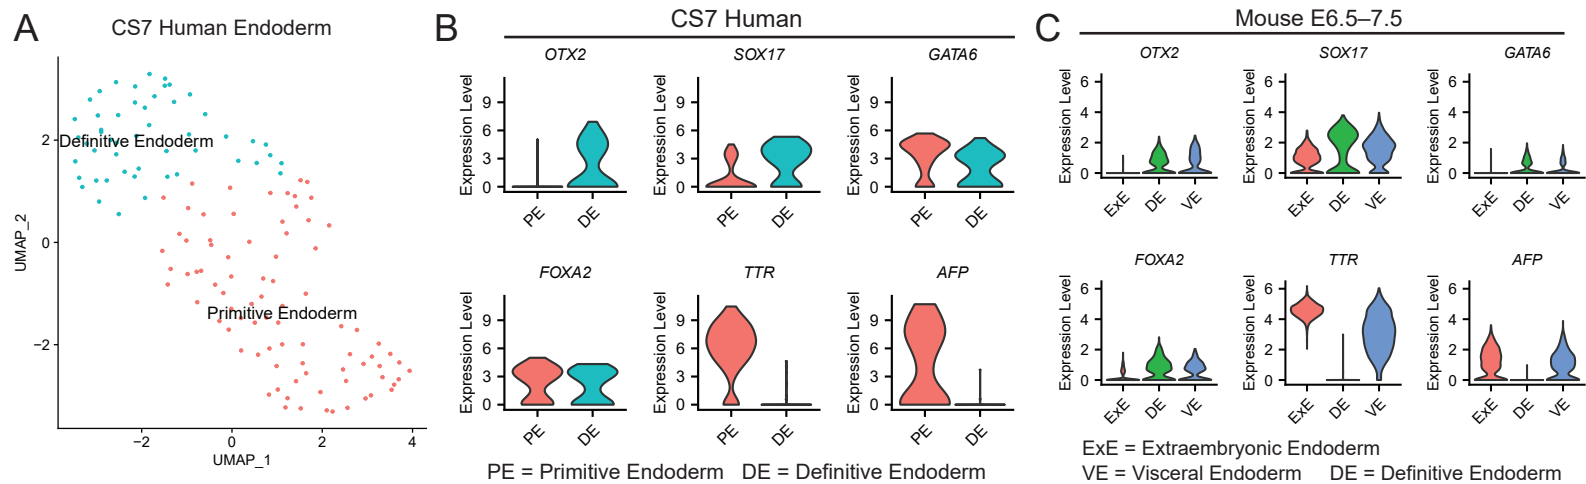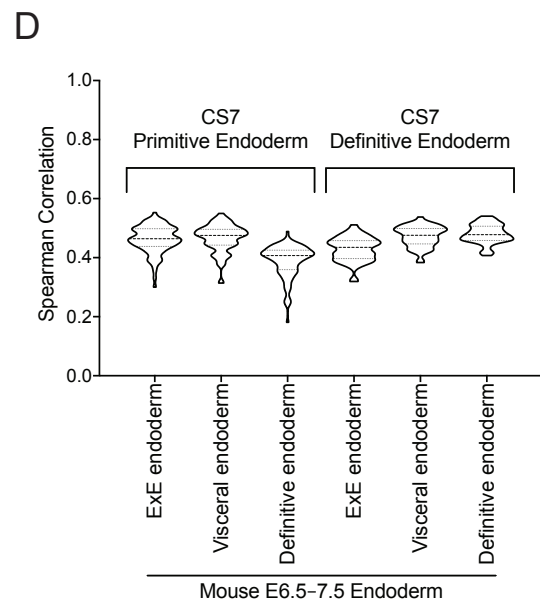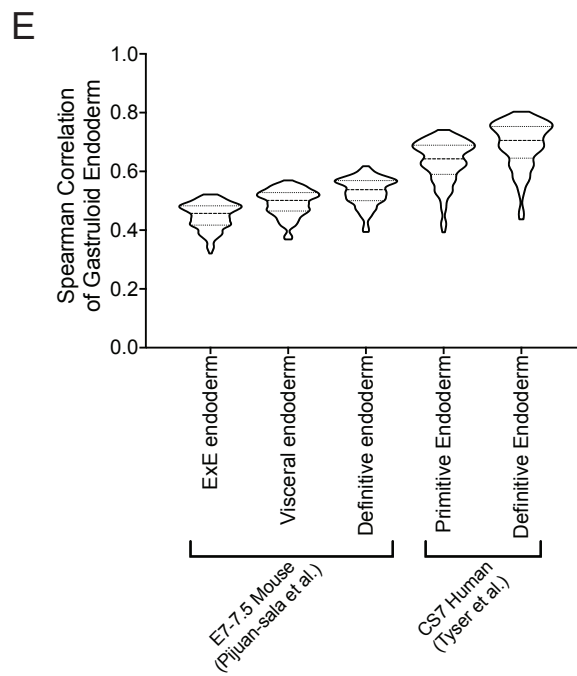



**Figure 6S. Supplemental information related to Figure 6**

(A) UMAP projection of CS7 human Endoderm identifying PE and DE.

(B and C) Violin plots showing expression of indicated endoderm markers in human (B) and mouse (C).

(D) Average gene expression correlation of indicated human and mouse endoderm derivatives.

(E) Average gene expression correlation of gastruloid endoderm to indicated human and mouse endoderm derivatives.

A

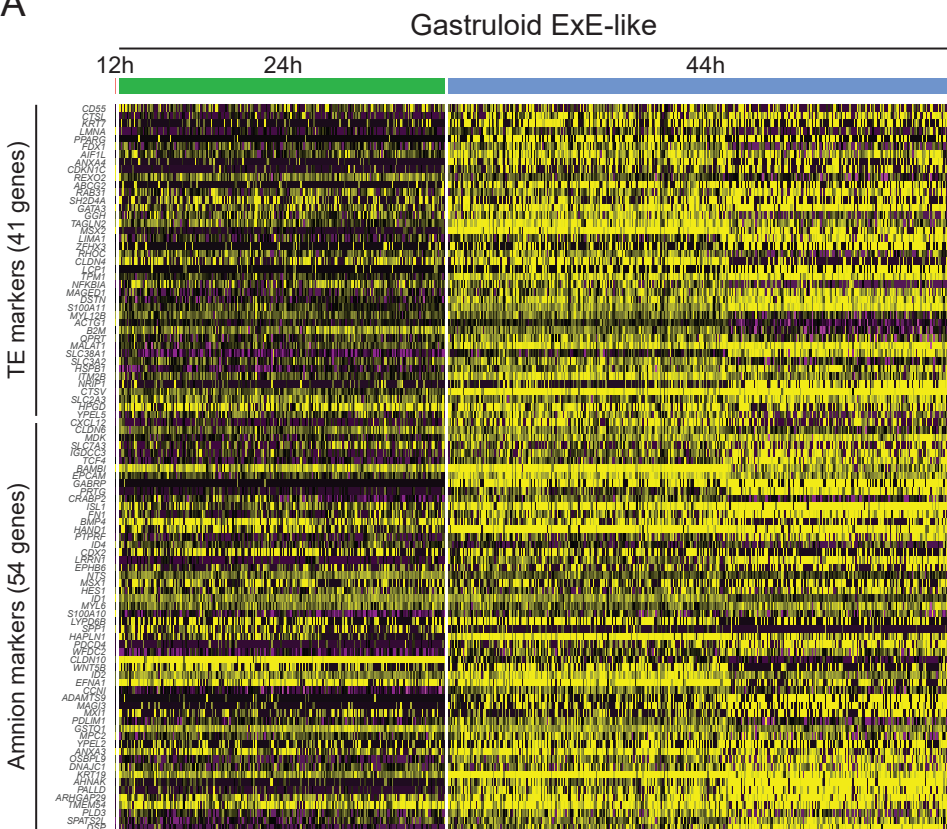

B

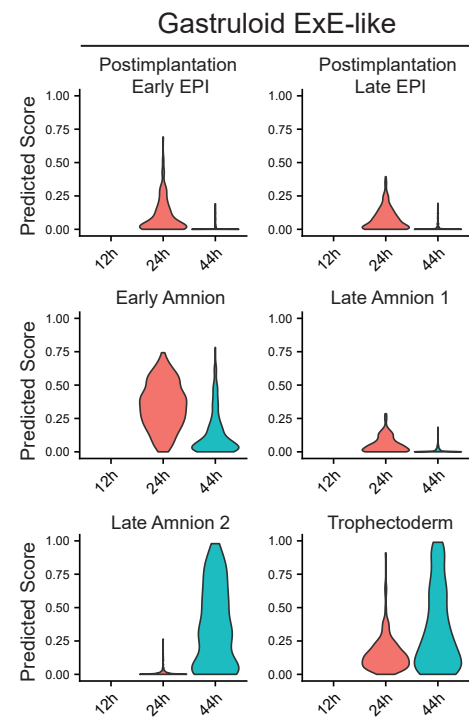

C

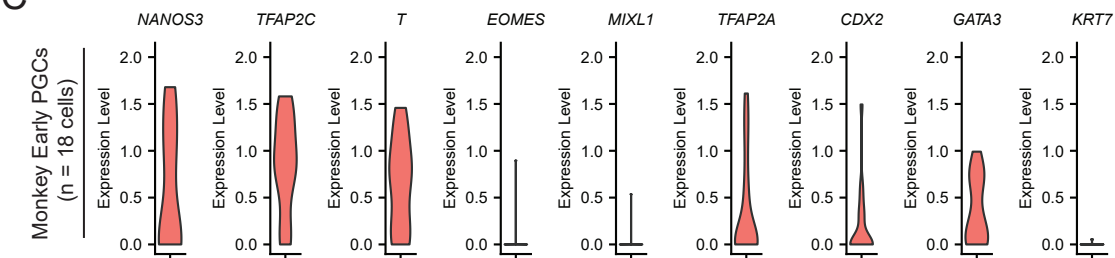

D

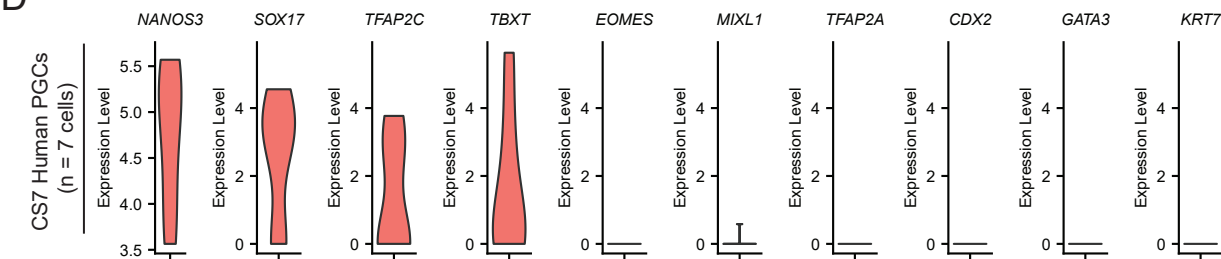

E

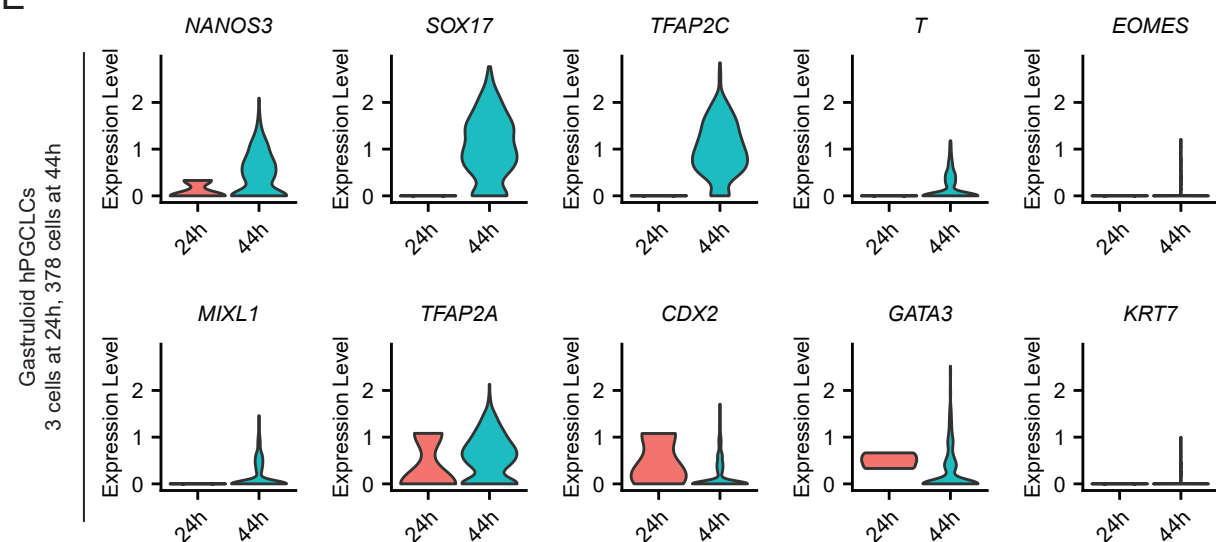

**Figure 7S. Supplemental information related to Figure 7**

(A) Heatmap showing expression of human and monkey TE markers in gastruloid ExE-like cells along the time course.

(B) Prediction score of monkey EPI, TE, and amnion in gastruloid ExE-like cells over the time course.

(C–E) Violin plot showing expression of indicated markers in monkey (C) and CS7 human (D) PGCs, and gastruloid hPGCLCs (E).
